# Supplementary material
Source: publisher figshare collection journal article supplement (https://karger.figshare.com/articles/dataset/_/25224380)
Supplement: Supplementary file 1 [file 1]

## Partie A Questionnaire pour les patients

### 1. Informations générales concernant l'oesophagite à éosinophiles (OeE)

L'OeE est une inflammation chronique de l'œsophage de type allergique avec une prévalence en constante augmentation. Cet organe permettant de relier la cavité buccale à l'estomac, mesure à l'âge adulte environ 25 cm de long, avec un diamètre d'environ 2,5 cm.

Environ 90% des patients souffrant d'OeE présentent d'autres allergies, aussi bien de type rhinite ou asthme, que liée à des allergies alimentaires. Ces aliments (soi-disant allergènes) pénètrent dans l'œsophage et provoquent une inflammation (avec la présence de cellules inflammatoires de type "éosinophile").

La symptomatologie clinique varie en fonction de l'âge du patient lors de la première manifestation. Le symptôme majeur chez l'adulte est la dysphagie pour les aliments solides. Celle-ci peut aller d'une légère gêne à la déglutition jusqu'à l'occlusion complète pouvant durer de quelques minutes à plusieurs heures. Contrairement aux adultes, les enfants atteints d'une OeE ont un spectre de plaintes nettement plus large avec des douleurs thoraciques, abdominales, diarrhées, vomissements, régurgitations, refus alimentaire et retard de croissance.

En l'absence de traitement, une inflammation éosinophile chronique peut provoquer un remodelage de l'œsophage avec fibrose, strictures sévères et limitations fonctionnelles. Les troubles de la déglutition des patients avec une OeE sont, soit causée par une inflammation active, soit par une sténose de l'œsophage. Les troubles de la déglutition peuvent, au pire des cas, aboutir à une impaction alimentaire dû à une sténose complète de l'œsophage (voir les photos ci-dessous).

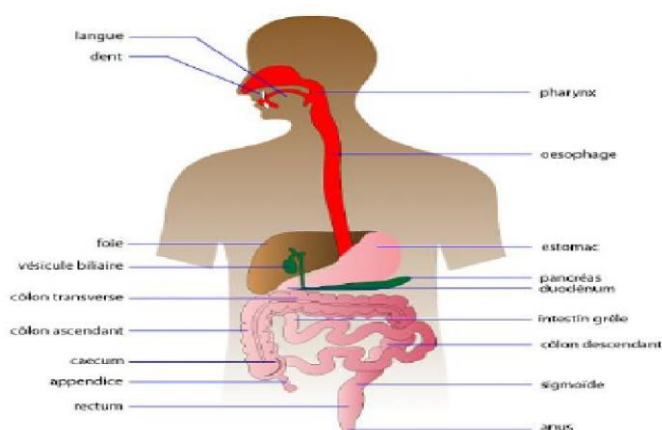

Œsophage reliant la bouche à l'estomac

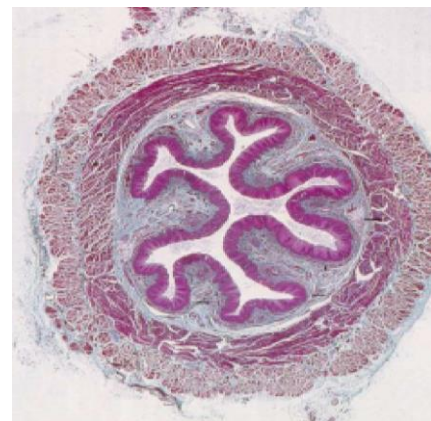

Coupe transversale de l'œsophage au microscope

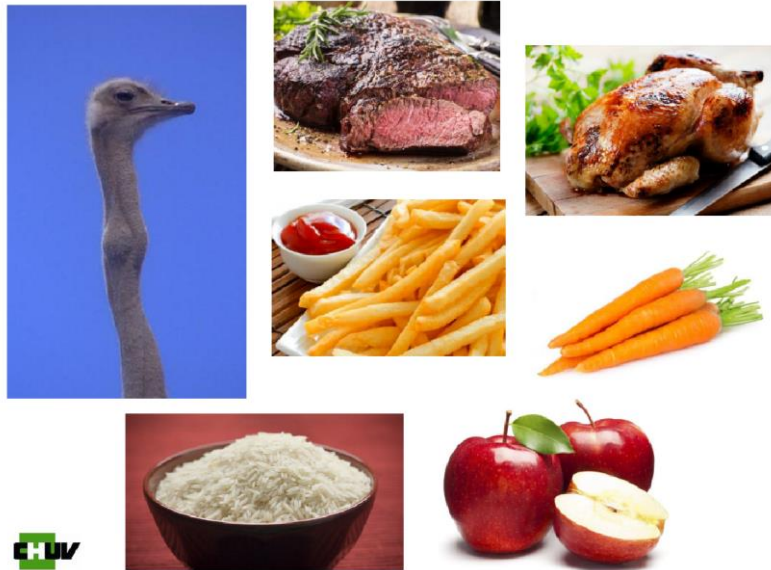

Les plaintes typiques des patients avec une OeE: dysphagie (en particulier pour les aliments solides)

## Découvertes endoscopiques

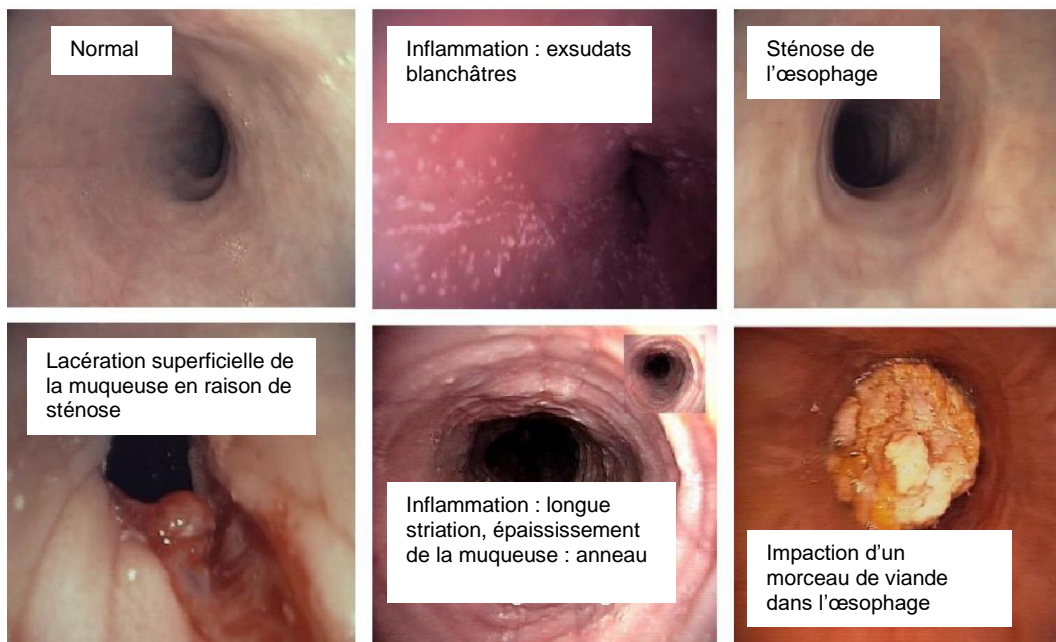

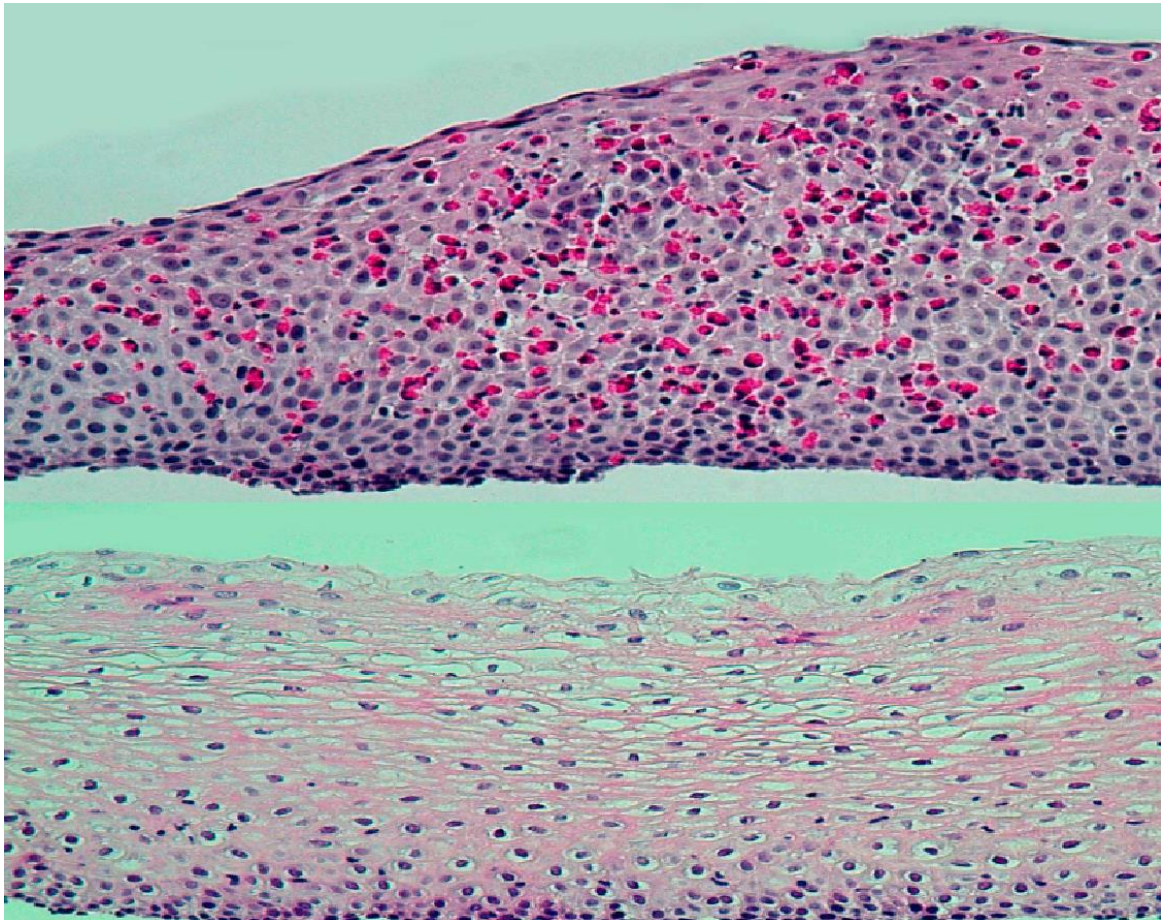

Echantillon de tissu (biopsie) : L'image du haut montre de nombreuses cellules inflammatoires éosinophiles chez les patients avec une OeE. L'illustration du dessous est une image normale de l'œsophage, sans cellule inflammatoire

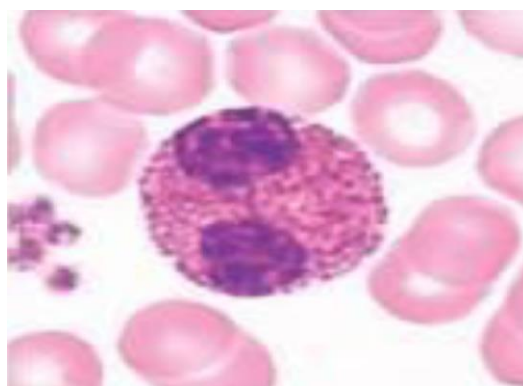

Cellule inflammatoire de type éosinophile



## 2. Comment peut-on mesurer l'activité de l'OeE ?

L'activité de l'OeE peut être mesurée de différentes manières :

- Par la clinique (les symptômes).
- Par la qualité de vie (l'OeE – lien avec la qualité de vie).
- Par l'activité visible à l'examen endoscopique et l'activité visible au microscope.

La maladie OeE peut, soit être silencieuse (en rémission), soit montrer une activité légère, modérée ou sévère.

Le tableau ci-dessous donne un aperçu sur les différents moyens et niveaux de mesure de l'activité de la maladie.

| Moyens                      | Niveaux de mesure                                                        |
|-----------------------------|--------------------------------------------------------------------------|
| Clinique                    | Symptômes                                                                |
| Lien avec la qualité de vie | Questionnaire sur la qualité de vie                                      |
| Endoscopie                  | Signes endoscopiques de l'activité inflammatoire et de la cicatrisation  |
| Microscopie                 | Nombre de cellules inflammatoires éosinophiles<br>Étendue des cicatrices |

Nous savons que la valeur prédictive des symptômes est limitée par l'évaluation de l'activité endoscopique/microscopique de la maladie. Nous avons récemment démontré que près d'un tiers des patients avec une OeE asymptomatique avait encore une inflammation active visible en endoscopie ou au microscope.

Nous savons aussi que l'inflammation à éosinophiles non traitée peut aboutir à des cicatrices et sténose de l'œsophage. Cela se traduisant ensuite par un trouble de la déglutition avec, au pire des cas, une impaction alimentaire complète, nécessitant un examen endoscopique en urgence.

Cependant nous ne savons pas si le but du traitement de l'OeE doit être «l'absence de symptômes» ou «la rémission de l'inflammation». Les expériences dont nous disposons indiquent qu'une absence totale de symptômes ; c'est à dire une alimentation sans restriction diététique et sans stratégie d'évitement telle que mâcher longuement et boire beaucoup, équivaut probablement à une rémission de l'inflammation.

### 3. Quelles sont les options de traitement pour les OeE ?

Il y a deux raisons de traiter une OeE. La première est la prévention des impactions alimentaires œsophagiennes totales, redoutées et imprévisibles. La seconde est la prévention des séquelles d'une inflammation chronique.

Aujourd'hui, il existe trois options de traitement disponibles :

- La première option est le traitement médicamenteux.
- La deuxième option comprend les régimes alimentaires avec éviction de certains allergènes.
- La troisième option est la dilatation de l'œsophage.

Lors d'une inflammation active, les traitements proposés sont principalement d'ordre médicamenteux ou sous forme de régime alimentaire. En cas de sténose sévère, le traitement par dilatation est utilisé.

Si les traitements anti-inflammatoires sont arrêtés, il survient fréquemment une récurrence de l'inflammation après 3-4 mois, ainsi qu'un inconfort. Cependant, une inflammation de l'œsophage n'est pas toujours accompagnée de symptômes. Comme mentionné ci-dessus, environ un tiers des patients avec une OeE asymptomatique peut avoir une inflammation active au niveau de l'œsophage visible au microscope.

L'OeE peut être traitée par l'utilisation de médicaments ou par la diète. Les deux mesures nécessitent un traitement au long terme. L'OeE étant une entité récente, découverte et étudiée que depuis quelques années, il n'existe pour le moment aucun traitement officiellement approuvé par l'autorité nationale de contrôle et d'autorisation « Swissmedic ».

Tu trouveras sur la page suivante un tableau récapitulatif montrant les effets des différents traitements, ainsi que des informations plus détaillées nécessaires.

## RÉSUMÉ: CARACTÉRISTIQUES DES DIFFÉRENTS TRAITEMENTS

|                                             | Corticoïdes topiques | Régime d'éviction basé sur des tests allergiques                                          | Régime d'éviction empirique                                                                                                                                                 | Dilatation de l'oesophage |
|---------------------------------------------|----------------------|-------------------------------------------------------------------------------------------|-----------------------------------------------------------------------------------------------------------------------------------------------------------------------------|---------------------------|
| Diminution des symptômes                    | ✓✓✓                  | ✓                                                                                         | ✓✓                                                                                                                                                                          | ✓✓✓                       |
| Diminution de l'inflammation en endoscopie  | ✓✓✓                  | ✓                                                                                         | ✓✓                                                                                                                                                                          | -                         |
| Diminution de l'inflammation en microscopie | ✓✓✓                  | ✓                                                                                         | ✓✓                                                                                                                                                                          | -                         |
| Diminution de la sténose de l'oesophage     | -                    | -                                                                                         | -                                                                                                                                                                           | ✓✓✓                       |
| Effets secondaires                          | ✓                    | -                                                                                         | -                                                                                                                                                                           | ✓                         |
| Commentaires                                |                      | Probabilité d'environ 30% que les tests allergiques identifient les aliments déclencheurs | Probabilité d'environ 70% que l'inflammation soit réduite au microscope. Il est possible que cela prenne 8 examens endoscopiques pour identifier les aliments déclencheurs. |                           |

### Légende :

- ✓✓✓ FORT EFFET RESPECTIVEMENT NOMBREUX EFFETS SECONDAIRES
- ✓✓ EFFET MODERE RESPECTIVEMENT EFFETS SECONDAIRES RELATIVEMENT NOMBREUX
- ✓ FAIBLE EFFET RESPECTIVEMENT PEU EFFETS SECONDAIRES
- AUCUN EFFET RESPECTIVEMENT AUCUN EFFET SECONDAIRE

### 3.1 Médicaments

#### 3.1.1. Corticoïdes topiques ingérés (et non inhalés) tels que la fluticasone ou le budésonide sous forme de sirop ou de poudre

##### Efficacité :

Ces principes actifs ne sont pratiquement pas absorbés dans le corps, de sorte qu'ils agissent directement sur la muqueuse de l'œsophage. Ils bloquent ainsi plusieurs phases de l'inflammation. Environ 90% des patients ayant une OeE active inflammatoire expérimentent une diminution importante des plaintes. Nous notons également une réduction importante, voire une disparition de l'inflammation à éosinophiles dans l'œsophage, quelques semaines après l'introduction du traitement.

##### Utilisation :

Les corticostéroïdes topiques se prennent deux fois par jour (une fois le matin et une fois le soir), avalés (sous forme de sirop ou poudre) et non pas inhalés. Après la prise du médicament, le patient doit rester à jeun (ne pas manger ni boire) pendant 30 minutes, puis se rincer la bouche (ce qui réduit le risque d'infection fongique dans la cavité buccale et l'œsophage).

##### Effets secondaires :

Il existe un risque légèrement augmenté de prolifération de lésions fongiques (Candida) dans la cavité buccale ou l'œsophage. Cette dernière peut être traitée de manière relativement simple par un comprimé antifongique à prendre pour 3-5 jours. Les effets secondaires des corticoïdes se retrouvent principalement lors de la nécessité d'un usage au long terme (quelques mois à quelques années). Théoriquement, lors d'une utilisation prolongée de plusieurs années, un risque d'ostéopénie (ostéoporose) est présent, mais ces données restent à être clarifiées.

##### Durée du traitement :

Ce traitement de première intention est typiquement utilisé pendant 2-4 semaines, lorsque les patients sont soit symptomatique et/ou présentent une inflammation active. Ce schéma a une efficacité assurée dans le traitement de l'inflammation et améliore sans aucun doute les symptômes de dysphagie. Les problèmes s'amendent la plupart du temps dans les deux à trois jours suivant le début du traitement. Un traitement d'entretien à doses plus faibles doit faire suite au traitement d'induction de deux à quatre semaines, faute de quoi la plupart des patients présenteront une récurrence après un à trois mois. Ce dernier peut être prolongé sur plusieurs années.

##### Coûts :

Les coûts de traitement s'élèvent à 60-80 francs par mois environ. Ceux-ci sont couverts par l'assurance maladie.

## **3.2 Diètes**

Chez la plupart des patients atteints d'OeE, des allergies à certains aliments sont retrouvées. L'OeE est donc une forme particulière d'allergie alimentaire. S'il est possible d'écarter les aliments responsables d'une réaction allergique dans l'œsophage, les symptômes de type inconfort ainsi que l'activité inflammatoire pourraient être contrôlés sans nécessité d'utilisation de traitements médicamenteux. Les aliments les plus à risque de causer une inflammation à éosinophiles dans l'œsophage sont : les produits laitiers, le blé, les œufs, le soja, les noix et les poissons / fruits de mer. Les deux régimes principalement utilisés sont les suivants.

### **3.2.1 Régime d'éviction alimentaire ciblée basé sur des tests allergiques (les tests cutanés et sanguins)**

#### Efficacité :

L'allergologue teste les patients avec une OeE à la recherche d'une allergie. Pour cela, il effectue des tests sanguins et cutanés. En cas de détection d'allergènes ces aliments peuvent être retirés de l'alimentation (par exemple, les produits laitiers, les noix, le blé, le soja). Ce régime normalise le nombre de cellules inflammatoires dans l'œsophage chez 27-35% des patients.

#### Réalisation :

Après avoir identifié les aliments allergènes, ceux-ci sont systématiquement éliminés de l'alimentation (par exemple, en évitant les produits à base de blé). Les instructions d'éviction alimentaire sont données, par un diététicien, au cours de multiples séances. Le régime alimentaire est un traitement conduit de façon ambulatoire (sans hospitalisation nécessaire). L'efficacité du régime d'élimination doit être déterminée au moyen d'une gastroscopie.

#### Effets secondaires :

Le patient doit éviter la consommation des aliments allergènes. Cela peut être associé à une limitation de la qualité de vie en raison de la restriction.

#### Durée du traitement :

Les patients chez qui le produit alimentaire allergène responsable a été identifié, doivent poursuivre le régime d'éviction sur le long terme (plusieurs mois voire plusieurs années).

#### Coûts :

La restriction de certains aliments peut nécessiter l'achat de produits plus coûteux.



### **3.2.2 Régime d'éviction empirique (éliminer les 6 aliments allergènes les plus courants avec, réintroduction progressive contrôlée après identification des « responsables » allergènes)**

#### Efficacité :

Ce régime normalise l'inflammation dans l'œsophage chez 70% des patients. L'efficacité de ce régime a été démontrée autant chez les enfants que chez les adultes.

#### Réalisation :

Les produits laitiers, le blé, les œufs, le soja, les noix, les poissons / crustacés sont complètement éliminés de l'alimentation pour une durée de 6-8 semaines. Par la suite, une gastroscopie est réalisée, avec prélèvement de type biopsie. La plupart du temps, on ne retrouve plus de cellules inflammatoires dans l'œsophage. Les différents aliments sont ensuite réintroduits, un par un, à intervalle de huit semaines. Environ 8 semaines après la réintroduction d'une catégorie d'aliments, un examen endoscopique est répété, pour déterminer si cette classe d'aliments est responsable de l'inflammation à éosinophiles dans l'œsophage. Ce processus se poursuit jusqu'à ce que tous les aliments allergènes soient identifiés. Ces aliments seront ensuite éliminés de l'alimentation. Les instructions d'éviction alimentaire sont données, par un diététicien, au cours de multiples séances. Le régime alimentaire est un traitement conduit de façon ambulatoire (sans hospitalisation nécessaire).

#### Effets secondaires :

Cela peut prendre environ un an avant que les aliments déclencheurs soient identifiés. Il est donc possible que le patient ait besoin d'environ 7-8 gastroscopies avant d'identifier les allergènes déclencheurs. Ce type de régime nécessite plusieurs séances avec le diététicien. Le patient ne peut consommer les aliments allergènes. Cela peut être associé à une limitation de la qualité de vie en raison de la restriction.

#### Durée du traitement :

Les patients chez qui le produit alimentaire allergène responsable a été identifié, doivent poursuivre le régime d'éviction sur le long terme (plusieurs mois voire plusieurs années).

#### Coûts :

La restriction de certains aliments peut nécessiter l'achat de produits plus coûteux.

### 3.3 Dilatation

#### Efficacité :

Environ 75% des patients traités connaissent une amélioration significative de la dysphagie, pouvant durer jusqu'à 12 mois.

#### Réalisation :

La gastroscopie est un examen visuel réalisé à l'aide d'un tube de petit calibre, long et flexible, muni en son bout d'une caméra (endoscope) introduit par la bouche. Le médecin introduira prudemment l'endoscope par la bouche pour visionner l'œsophage, l'estomac et le duodénum (première partie du petit intestin).

Après avoir identifié la zone rétrécie et si cela est possible, le médecin introduira un ballon de dilatation au niveau de la sténose. Par la suite ce ballon sera gonflé, ce qui permettra d'élargir la zone rétrécie. Dans certains cas, ces dilatations peuvent être effectuées en utilisant des bougies d'un diamètre croissant à l'aide d'un guide. L'examen dure 10 minutes et sera réalisé sous anesthésie générale.

Cette intervention permet d'élargir des rétrécissements de l'œsophage sans traiter l'inflammation sous-jacente. Des sténoses peuvent donc réapparaître après quelques mois/années avec la nécessité d'une nouvelle dilatation.

#### Effets secondaires :

Après l'intervention, environ la moitié des patients présentent des douleurs ou un sentiment d'oppression dans la cage thoracique ou au niveau abdominal pouvant durer 2-3 jours, répondant au traitement par antalgie simple de type Paracétamol. Dans de rares cas (<1%), des lésions importantes (perforation) de la paroi de l'œsophage ou de l'intestin ainsi que des saignements importants peuvent survenir suite à la dilatation. En cas de survenue d'une perforation de l'œsophage, celle-ci peut être réparée, soit à l'aide de petites pinces métalliques (insérées à travers l'endoscope), soit à l'aide d'un stent, temporairement utilisés pour ensuite être retirés après quelques semaines. Les opérations de l'œsophage, à la suite de complications de dilatations, sont rarement nécessaires.

#### Durée du traitement :

En principe, les dilatations peuvent (si nécessaire) être réalisées aussi souvent que souhaitées. En général, les patients doivent être traités une fois par an par une dilatation, si ceux-ci ne suivent pas de thérapie médicamenteuse anti-inflammatoire ou de régime alimentaire.

#### Coûts :

Le coût d'une gastroscopie avec un traitement de dilatation est d'environ 900 francs et est couvert par l'assurance maladie.

## Partie B : Questionnaire pour les patients

Nous te demandons de répondre aux questions suivantes concernant ta maladie et tes traitements actuels.

### INSTRUCTIONS

Nous aimerions te poser quelques questions concernant ta maladie. Il se peut qu'une question soit oubliée, merci de vérifier que tu n'as pas oublié de répondre à l'une d'entre elles. Nous te remercions sincèrement de ton aide dans cette étude.

Merci de remplir ce questionnaire de la manière suivante :

En cochant les champs correspondants

OU

En comblant les lacunes prédéterminées

Avant 12 mois

Autres raisons (merci de spécifier) : J'ai une autre maladie

Si tu corriges une réponse, merci de supprimer la réponse faussée et de noter tes initiales à côté de la réponse correcte. Si tu souhaites laisser un commentaire concernant une question, par exemple si la question n'est pas claire et tu as des difficultés à y répondre, merci de le mentionner sur la dernière feuille que nous avons laissé vide. Tes commentaires nous aideront à améliorer notre questionnaire. Nous apprécions énormément les suggestions que tu puisses avoir !

## QUESTIONNAIRE PARTIE 1: QUESTIONS GENERALES

Avant que nous te posions des questions sur les symptômes de ta maladie, nous souhaiterions que tu répondes à quelques questions générales concernant ton âge, sexe, origine et profession. Nous te posons ces questions, car les symptômes de la maladie diffèrent en fonction de l'âge et du sexe. Il se peut également que le pays d'origine ou la profession soient des facteurs modifiant la maladie.

1      **Date d'aujourd'hui**      Jour \_\_\_\_ Mois \_\_\_\_ Année \_\_\_\_

2      **Année de naissance**      Année \_\_\_\_

3      **Sexe**      ☐ Femme  
                                         ☐ Homme

4      **Depuis quand vis-tu en Suisse ?**  
                                         ☐ Depuis la naissance  
                                         ☐ Depuis \_\_\_\_ (année, p.ex 1971)

5      **Quelle est ta nationalité ?**

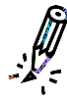

☐ Suisse  
☐ Autre nationalité

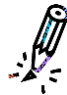

\_\_\_\_\_  
☐ Les deux (Suisse et autre nationalité à citer)

\_\_\_\_\_

**6 Quelle formation as-tu?**  
 (Merci de saisir toutes les formations terminées. Plusieurs réponses sont possibles.)

Formations terminées

|                                                                                                                                                                                                                                                                                             |                          |
|---------------------------------------------------------------------------------------------------------------------------------------------------------------------------------------------------------------------------------------------------------------------------------------------|--------------------------|
| Ecole obligatoire (école primaire, école secondaire, cycle d'orientation, pré gymnase, école spéciale)                                                                                                                                                                                      | <input type="checkbox"/> |
| 1 an de préapprentissage, 1 an d'école de formation générale, 10 <sup>e</sup> année scolaire, 1 an d'école d'orientation professionnelle, année d'enseignement ménager, séjour linguistique (au minimum 1 an) avec diplôme, année d'engagement social, formation transitoire ou équivalente | <input type="checkbox"/> |
| 2 à 3 ans d'école de degré diplôme, d'école d'administration et des transports, école de culture générale ECG ou formation équivalente                                                                                                                                                      | <input type="checkbox"/> |
| Formation professionnelle élémentaire ou initiale (2 à 4 ans d'apprentissage ou d'école professionnelle à plein temps, école supérieure de commerce, école de métiers ou formation équivalente)                                                                                             | <input type="checkbox"/> |
| Maturité gymnasiale, école normale (préparant à l'enseignement aux niveaux jardin d'enfants, école primaire, travaux manuels, économie ménagère)                                                                                                                                            | <input type="checkbox"/> |
| Maturité professionnelle ou maturité spécialisée                                                                                                                                                                                                                                            |                          |
| Formation professionnelle supérieure avec brevet ou diplôme fédéral ou maîtrise, école technique ou autre école professionnelle, ET ou ES, ESGC (2 ans d'études à plein temps ou 3 ans à temps partiel)                                                                                     | <input type="checkbox"/> |
| Ecole professionnelle supérieure (prédécesseur des hautes écoles spécialisées p. ex. ETS, ESCEA, ESSA, IES) y compris diplômes post grades (3 ans d'études à plein temps ou 4 ans à temps partiel)                                                                                          | <input type="checkbox"/> |
| Bachelor (université, EPF, haute école spécialisée, haute école pédagogique), master, licence, diplôme, examen d'Etat, diplôme post grade (université, EPF, haute école spécialisée, haute école pédagogique), doctorat, habilitation                                                       | <input type="checkbox"/> |

**7 Profession apprise: quelle profession as-tu apprise dans le cadre de ta formation achevée la plus élevée ?**  
 (Par exemple ; employé de bureau, électricien, infirmier)

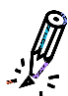

*Maintenant, nous aimerions te poser quelques questions générales sur l'OeE*

**8 Quand as-tu présenté les premiers symptômes de ta maladie (avant même que le diagnostic n'ait été posé) ?**

*Les symptômes typiques des OeE sont une dysphagie ou une douleur thoracique. A titre d'exemple, si les plaintes de l'OeE ont débutées il y a environ 5 ans, répondre comme suit: Depuis \_\_ \_\_ mois OU depuis env. \_\_ 5 ans.  
 Si tu ne te souviens pas exactement de la date, essaie d'estimer au plus juste.*

Depuis \_\_ \_\_ mois OU depuis environ \_\_ \_\_ ans



**9 Quand est-ce que le diagnostic d'oesophagite à éosinophiles a été posé ?**

*(Année, par exemple, 1996). Si tu ne te souviens pas exactement de la date, essaie d'estimer au plus juste.*

— — — —

**10 As-tu déjà connu une impaction alimentaire ayant nécessité la réalisation d'une gastroscopie en urgence?**

*Si tu ne te souviens pas exactement de la date, essaie d'estimer au plus juste.*

☐ Oui    ☐ Non – **Aller à la question 11**

Si oui, quand était le dernier épisode ? (Année, par exemple, 1996)

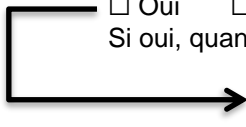
 — — — —

**11 Est-ce qu'un médecin ou un professionnel de la santé t'a-t-il déjà dit que tu souffrais de maladie de reflux (brûlures d'estomac, régurgitation acide) ?**

☐ Non – **Aller à la question 12**

☐ Je ne sais pas

☐ Oui, mais le diagnostic était erroné

☐ Oui


**Si oui, en as-tu souffert au cours des 12 derniers mois ?**

☐ Non

☐ Je ne sais pas

☐ Oui

**12 Est-ce qu'un médecin ou un professionnel de la santé t'a-t-il déjà dit que tu avais de l'asthme ?**

*Les symptômes typiques sont la toux, l'essoufflement ou l'oppression dans la poitrine.*

☐ Non – **Aller à la question 13**

☐ Je ne sais pas

☐ Oui


**Si oui, en as-tu souffert au cours des 12 derniers mois ?**

☐ Non

☐ Je ne sais pas

☐ Oui

**13 Est-ce qu'un médecin ou un professionnel de la santé t'a-t-il déjà dit que tu avais le rhume des foins ?**

*Les symptômes typiques sont la rhino-pharyngite, les éternuements, les yeux larmoyants p. ex sur les graminées, les pollens, les acariens, les chiens, les chats.*

☐ Non – **Aller à la question 14**

☐ Je ne sais pas

☐ Oui

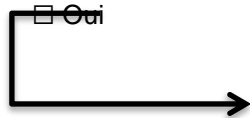

**Si oui, en as-tu souffert au cours des 12 derniers mois ?**

☐ Non

☐ Je ne sais pas

☐ Oui

**14 Est-ce qu'un médecin ou un professionnel de la santé t'a-t-il déjà dit que tu avais de l'eczéma (réaction allergique cutanée) ?**

☐ Non – **Aller à la question 15**

☐ Je ne sais pas

☐ Oui

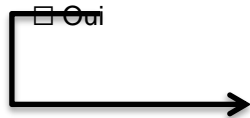

**Si oui, en as-tu souffert au cours des 12 derniers mois ?**

☐ Non

☐ Je ne sais pas

☐ Oui

**15 Est-ce qu'un médecin ou un professionnel de la santé t'a-t-il déjà dit que tu avais des allergies alimentaires ?**

*Informations complémentaires: Cette question ne porte PAS sur l'œsophagite à éosinophiles, mais sur d'autres allergies alimentaires. Les symptômes typiques comprennent les démangeaisons des lèvres et de la gorge, une sensation de chat dans la gorge, un gonflement des lèvres, de la langue, des joues et de la gorge immédiatement après avoir mangé de la nourriture. Dans le pire des cas, la réaction allergique peut aboutir à un choc anaphylactique conduisant à une détresse respiratoire, une perte de conscience à un arrêt cardio-respiratoire.*

☐ Non – **Aller à la question 16**

☐ Je ne sais pas

☐ Oui

→ **Si oui, en as-tu souffert au cours des 12 derniers mois ?**

☐ Non

☐ Je ne sais pas

☐ Oui

→ **Si oui, quel est l'aliment concerné ?**

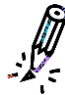

**Maintenant, nous aimerions savoir quels traitements as-tu bénéficié dans le passé, et quels type de traitement suis-tu actuellement. Merci de mentionner tous les traitements que tu as eu depuis le diagnostic de l'OeE**

- 16 As-tu déjà eu un traitement antiacide (par exemple Esomep® (ésoméprazole), Pariet® (rabéprazole) Pantozol® ou Zurcal® (pantoprazole), Agopton® ou Lansoprazol® (lansoprazole), Oméprazole Sandoz® (oméprazole), Dexilant® (Dexlansoprazole)) pour le traitement de l'OeE ?

*Informations complémentaires: les médicaments antiacides (également connu sous le nom d'inhibiteurs de la pompe à protons = IPP) sont des médicaments qui inhibent la production d'acide gastrique dans l'estomac. Ce type de traitement est prescrit non seulement pour le traitement de l'OeE, mais aussi pour traiter les brûlures d'estomac ou comme médicament protecteur gastrique lorsque des médicaments pouvant irriter pour l'estomac doivent être pris. En répondant à cette question, merci de ne considérer que les médicaments que tu prends pour le traitement de ton OeE (et non pas les médicaments en lien avec des brûlures d'estomac ou autres).*

☐ Non – Aller à la question 17

☐ Oui

→ Si oui, prends-tu actuellement un traitement IPP ?

☐ Oui

☐ Non

|                                                                                                                                                                                                                                                                                                   | Si oui                                                                                                                                                                                                    |
|---------------------------------------------------------------------------------------------------------------------------------------------------------------------------------------------------------------------------------------------------------------------------------------------------|-----------------------------------------------------------------------------------------------------------------------------------------------------------------------------------------------------------|
| <b>Depuis combien de temps prends-tu un traitement antiacide (IPP) ?</b><br>Par exemple, si tu prends des antiacides depuis cinq ans, répond de la manière suivante :<br>Depuis ____ mois OU depuis <u>5</u> ans. Si tu ne te souviens pas exactement de la date, essaie d'estimer au plus juste. | Depuis ____ mois<br>OU<br>Depuis ____ ans                                                                                                                                                                 |
| <b>A quelle fréquence prends-tu un traitement antiacide ?</b>                                                                                                                                                                                                                                     | <input type="checkbox"/> Tous les jours<br><input type="checkbox"/> Plusieurs fois par semaine<br><input type="checkbox"/> Une fois par semaine<br><input type="checkbox"/> Moins qu'une fois par semaine |

|                                                                                                                                                                                                                                                                                                  | Si non                                                                                                                                                                                                    |
|--------------------------------------------------------------------------------------------------------------------------------------------------------------------------------------------------------------------------------------------------------------------------------------------------|-----------------------------------------------------------------------------------------------------------------------------------------------------------------------------------------------------------|
| <b>Depuis combien de temps as-tu arrêté l'antiacide ?</b><br>Par exemple, si tu as arrêté de prendre des antiacides il y a cinq ans, répond de la manière suivante :<br>Depuis ____ mois OU depuis <u>5</u> ans. Si tu ne te souviens pas exactement de la date, essaie d'estimer au plus juste. | Depuis ____ mois<br>OU<br>Depuis ____ ans                                                                                                                                                                 |
| <b>Pendant combien de temps as-tu pris un antiacide ?</b><br>Par exemple, si tu as pris les antiacides pendant cinq ans, répond de la manière suivante :<br>Pendant ____ mois OU pendant <u>5</u> ans. Si tu ne te souviens pas exactement de la date, essaie d'estimer au plus juste.           | Pendant ____ mois<br>OU<br>Pendant ____ ans                                                                                                                                                               |
| <b>A quelle fréquence prends-tu un traitement antiacide ?</b>                                                                                                                                                                                                                                    | <input type="checkbox"/> Tous les jours<br><input type="checkbox"/> Plusieurs fois par semaine<br><input type="checkbox"/> Une fois par semaine<br><input type="checkbox"/> Moins qu'une fois par semaine |

|                                                             |                                                                                                                                                                   |
|-------------------------------------------------------------|-------------------------------------------------------------------------------------------------------------------------------------------------------------------|
| <p>Pourquoi les bloqueurs d'acide ont-ils été arrêtés ?</p> | <input type="checkbox"/> Ils n'ont apporté aucune amélioration à mes symptômes de l'OeE                                                                           |
|                                                             | <input type="checkbox"/> Ils étaient initialement efficaces, mais ont ensuite perdu de leur efficacité                                                            |
|                                                             | <input type="checkbox"/> Ils ont conduit à des effets secondaires<br>lesquels  |
|                                                             | <input type="checkbox"/> Autres raisons<br>lesquels                            |

- 17 **As-tu déjà pris des traitements à base de corticoïdes topiques (par exemple Miflonide® (budésonide), Pulmicort® (budésonide), ou Axotide® (fluticasone)), qui sont ingérés sous forme de sirop, de poudre ou de pulvérisation, pour le traitement de l'OeE ?**

*Informations complémentaires: Ces médicaments ne sont pratiquement pas absorbés dans le corps, de sorte qu'ils agissent directement sur la muqueuse de l'œsophage en bloquant plusieurs étapes de l'inflammation. Par conséquent, ces médicaments ne produisent relativement que peu d'effets secondaires.*

☐ Non – **Aller à la question 18**

☐ Oui

**Si oui, comment as-tu pris ces médicaments ?**

*Plusieurs réponses sont possibles.*

- ☐ Sous forme de sirop  
☐ Sous forme de poudre  
☐ En pulvérisation

**Si oui, prends-tu actuellement un traitement de corticoïdes topiques ?**

☐ Oui

☐ Non



|                                                                                                                                                                                                                                                                                                              | Si oui                                                                                                                                                                                                    |
|--------------------------------------------------------------------------------------------------------------------------------------------------------------------------------------------------------------------------------------------------------------------------------------------------------------|-----------------------------------------------------------------------------------------------------------------------------------------------------------------------------------------------------------|
| <b>Depuis combien de temps prends-tu un traitement de corticoïdes topiques ?</b><br>Par exemple, si tu prends des corticoïdes depuis cinq ans, répond de la manière suivante :<br>Depuis ___ __ mois OU depuis <u>5</u> ans. Si tu ne te souviens pas exactement de la date, essaie d'estimer au plus juste. | Depuis ___ __ mois<br>OU<br>Depuis ___ __ ans                                                                                                                                                             |
| <b>Sous quelles forme prends-tu actuellement ces médicaments ?</b>                                                                                                                                                                                                                                           | <input type="checkbox"/> Sous forme de sirop<br><input type="checkbox"/> Sous forme de poudre<br><input type="checkbox"/> En pulvérisation                                                                |
| <b>A quelle fréquence prends-tu un traitement de corticoïdes topiques ?</b>                                                                                                                                                                                                                                  | <input type="checkbox"/> Tous les jours<br><input type="checkbox"/> Plusieurs fois par semaine<br><input type="checkbox"/> Une fois par semaine<br><input type="checkbox"/> Moins qu'une fois par semaine |
| <b>Combien de fois par jour le prends-tu ?</b>                                                                                                                                                                                                                                                               | <input type="checkbox"/> 1 fois<br><input type="checkbox"/> 2 fois                                                                                                                                        |

|                                                                                                                                                                                                                                                                                                                  | Si non                                                                                                                                                                                                                                                                                                                                                                                                                                                                                                                                                                                                                      |
|------------------------------------------------------------------------------------------------------------------------------------------------------------------------------------------------------------------------------------------------------------------------------------------------------------------|-----------------------------------------------------------------------------------------------------------------------------------------------------------------------------------------------------------------------------------------------------------------------------------------------------------------------------------------------------------------------------------------------------------------------------------------------------------------------------------------------------------------------------------------------------------------------------------------------------------------------------|
| <b>Depuis combien de temps as-tu arrêté les corticoïdes topiques ?</b><br>Par exemple, si tu as arrêté de prendre les corticoïdes il y a cinq ans, répond de la manière suivante :<br>Depuis ___ __ mois OU depuis <u>5</u> ans. Si tu ne te souviens pas exactement de la date, essaie d'estimer au plus juste. | Depuis ___ __ mois<br>OU<br>Depuis ___ __ ans                                                                                                                                                                                                                                                                                                                                                                                                                                                                                                                                                                               |
| <b>Pendant combien de temps as-tu pris des corticoïdes topiques ?</b><br>Par exemple, si tu as pris les corticoïdes pendant cinq ans, répond de la manière suivante :<br>Pendant ___ __ mois OU pendant <u>5</u> ans. Si tu ne te souviens pas exactement de la date, essaie d'estimer au plus juste.            | Pendant ___ __ mois<br>OU<br>Pendant ___ __ ans                                                                                                                                                                                                                                                                                                                                                                                                                                                                                                                                                                             |
| <b>Sous quelle forme prenais-tu ces médicaments ?</b>                                                                                                                                                                                                                                                            | <input type="checkbox"/> Sous forme de sirop<br><input type="checkbox"/> Sous forme de poudre<br><input type="checkbox"/> En pulvérisation                                                                                                                                                                                                                                                                                                                                                                                                                                                                                  |
| <b>A quelle fréquence prenais-tu ces médicaments ?</b>                                                                                                                                                                                                                                                           | <input type="checkbox"/> Tous les jours<br><input type="checkbox"/> Plusieurs fois par semaine<br><input type="checkbox"/> Une fois par semaine<br><input type="checkbox"/> Moins qu'une fois par semaine                                                                                                                                                                                                                                                                                                                                                                                                                   |
| <b>Pourquoi les corticoïdes topiques ont-ils été arrêtés ?</b>                                                                                                                                                                                                                                                   | <input type="checkbox"/> Ils n'ont apporté aucune amélioration à mes symptômes de l'OeE<br><br><input type="checkbox"/> Ils étaient initialement efficaces, mais ont ensuite perdu de leur efficacité<br><br><input type="checkbox"/> En raison des propriétés indésirables pour lesquelles sont connus les corticoïdes<br><br><input type="checkbox"/> En raison d'une étude, dans laquelle je prends un autre médicament<br><br><input type="checkbox"/> Ils ont conduit à des effets secondaires<br><br>Lesquels <br>_____<br>_____ |

|  |                                                                                                                                                        |
|--|--------------------------------------------------------------------------------------------------------------------------------------------------------|
|  | <input type="checkbox"/> Autres raisons<br>Lesquels <br><hr/> <hr/> |
|--|--------------------------------------------------------------------------------------------------------------------------------------------------------|

**18 As-tu déjà pris des comprimés à base de corticoïde (par exemple des comprimés de prednisone) pour le traitement l'OeE ?**

*Informations complémentaires: Ces médicaments sont de puissants anti-inflammatoires, qui sont pris sous forme de comprimé. Ils agissent sur le plan systémique et ne cible pas uniquement l'œsophage. Ils sont utilisés lorsque les patients ne répondent pas aux antiacides ou corticostéroïdes topiques.*

☐ Non – Aller à la question 19

☐ Oui

→ Si oui, prends-tu actuellement des corticoïdes systémiques ?

☐ Oui

☐ Non

|                                                                                                                                                                                                                                                                                                               | Si oui                                                                                                                                                                                                    |
|---------------------------------------------------------------------------------------------------------------------------------------------------------------------------------------------------------------------------------------------------------------------------------------------------------------|-----------------------------------------------------------------------------------------------------------------------------------------------------------------------------------------------------------|
| <b>Depuis combien de temps prends-tu un traitement de corticoïdes systémiques ?</b><br>Par exemple, si tu prends des corticoïdes depuis cinq ans, répond de la manière suivante :<br>Depuis ____ mois OU depuis <u>5</u> ans. Si tu ne te souviens pas exactement de la date, essaie d'estimer au plus juste. | Depuis ____ mois<br>OU<br>Depuis ____ ans                                                                                                                                                                 |
| <b>A quelle fréquence prends-tu un traitement de corticoïdes systémiques ?</b>                                                                                                                                                                                                                                | <input type="checkbox"/> Tous les jours<br><input type="checkbox"/> Plusieurs fois par semaine<br><input type="checkbox"/> Une fois par semaine<br><input type="checkbox"/> Moins qu'une fois par semaine |

|                                                                                                                                                                                                                                                                                                                   | Si non                                                                                                                                                                                                    |
|-------------------------------------------------------------------------------------------------------------------------------------------------------------------------------------------------------------------------------------------------------------------------------------------------------------------|-----------------------------------------------------------------------------------------------------------------------------------------------------------------------------------------------------------|
| <b>Depuis combien de temps as-tu arrêté les corticoïdes systémiques ?</b><br>Par exemple, si tu as arrêté de prendre les corticoïdes il y a cinq ans, répond de la manière suivante :<br>Depuis ____ mois OU depuis <u>5</u> ans. Si tu ne te souviens pas exactement de la date, essaie d'estimer au plus juste. | Depuis ____ mois<br>OU<br>Depuis ____ ans                                                                                                                                                                 |
| <b>Combien de temps as-tu pris des corticoïdes systémiques ?</b><br>Par exemple, si tu as pris les corticoïdes pendant cinq ans, répond de la manière suivante :<br>Pendant ____ mois OU pendant <u>5</u> ans. Si tu ne te souviens pas exactement de la date, essaie d'estimer au plus juste.                    | Pendant ____ mois<br>OU<br>Pendant ____ ans                                                                                                                                                               |
| <b>A quelle fréquence prenais-tu ces médicaments ?</b>                                                                                                                                                                                                                                                            | <input type="checkbox"/> Tous les jours<br><input type="checkbox"/> Plusieurs fois par semaine<br><input type="checkbox"/> Une fois par semaine<br><input type="checkbox"/> Moins qu'une fois par semaine |

|                                                                          |                                                                                                                                                                                                                                                                                                                                                                                                                                                                                                                                                                                                                                                                                        |
|--------------------------------------------------------------------------|----------------------------------------------------------------------------------------------------------------------------------------------------------------------------------------------------------------------------------------------------------------------------------------------------------------------------------------------------------------------------------------------------------------------------------------------------------------------------------------------------------------------------------------------------------------------------------------------------------------------------------------------------------------------------------------|
| <p><b>Pourquoi les corticoïdes systémiques ont-ils été arrêtés ?</b></p> | <p><input type="checkbox"/> Ils n'ont apporté aucune amélioration à mes symptômes de l'OeE</p> <p><input type="checkbox"/> Ils étaient initialement efficaces, mais ont ensuite perdu de leur efficacité</p> <p><input type="checkbox"/> En raison des propriétés indésirables pour lesquelles sont connus les corticoïdes</p> <p><input type="checkbox"/> Ils ont conduit à des effets secondaires</p> <p>Lesquels </p> <hr/> <hr/> <p><input type="checkbox"/> Autres raisons</p> <p>Lesquels </p> <hr/> <hr/> |
|--------------------------------------------------------------------------|----------------------------------------------------------------------------------------------------------------------------------------------------------------------------------------------------------------------------------------------------------------------------------------------------------------------------------------------------------------------------------------------------------------------------------------------------------------------------------------------------------------------------------------------------------------------------------------------------------------------------------------------------------------------------------------|

**19 As-tu déjà traité ton OeE par des diètes ?**

☐ Non – Aller à la question 20

☐ Oui

**Si oui, quelle diète as-tu suivie ?**

- ☐ Régime d'éviction empirique en éliminant les 6 aliments allergènes les plus courants (les produits laitiers, le blé, les œufs, le soja, les noix, les poissons / crustacés) pendant 6-8 semaines avec réintroduction progressive
- ☐ Régime d'éviction alimentaire ciblée basé sur des tests allergiques (tests cutanés ou sanguins)
- ☐ Régime élémentaire (formule d'acides aminés)
- ☐ Autre. Merci de mentionner lequel

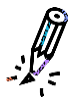

**Si oui, suis-tu actuellement une diète ?**

☐ Oui

☐ Non

|                                                                                                                                                                                                                                                                      | Si oui                                                                                                                                                                                                                                                                                                                                                                  |
|----------------------------------------------------------------------------------------------------------------------------------------------------------------------------------------------------------------------------------------------------------------------|-------------------------------------------------------------------------------------------------------------------------------------------------------------------------------------------------------------------------------------------------------------------------------------------------------------------------------------------------------------------------|
| <b>Quelle diète ?</b>                                                                                                                                                                                                                                                | <input type="checkbox"/> Régime d'éviction empirique en éliminant les 6 aliments allergènes les plus courants pendant 6-8 semaines avec réintroduction progressive<br><input type="checkbox"/> Régime d'éviction alimentaire ciblée basé sur des tests allergiques cutanés ou sanguins<br><input type="checkbox"/> Régime élémentaire<br><input type="checkbox"/> Autre |
| <b>Depuis combien de temps suis-tu une diète ?</b><br>Par exemple, si tu suis une diète depuis cinq ans, répond de la manière suivante :<br>Depuis ____ mois OU depuis <u>5</u> ans. Si tu ne te souviens pas exactement de la date, essaie d'estimer au plus juste. | Depuis ____ mois<br>OU<br>Depuis ____ ans                                                                                                                                                                                                                                                                                                                               |
| <b>Avec quelle rigueur suis-tu ta diète ?</b>                                                                                                                                                                                                                        | De façon :<br><input type="checkbox"/> très stricte<br><input type="checkbox"/> peu stricte<br><input type="checkbox"/> pas stricte                                                                                                                                                                                                                                     |
| <b>Quels aliments dois-tu éviter ? (p. ex produits laitiers, blé, etc.)</b>                                                                                                                                                                                          | Lesquels <br>_____<br>_____<br>_____                                                                                                                                                                                                                                                 |

|                                                                                                                                                                                                                                                                                                    | Si non                                                                                                                                                                                                                                                                                                                                                                                                                                                                                                                           |
|----------------------------------------------------------------------------------------------------------------------------------------------------------------------------------------------------------------------------------------------------------------------------------------------------|----------------------------------------------------------------------------------------------------------------------------------------------------------------------------------------------------------------------------------------------------------------------------------------------------------------------------------------------------------------------------------------------------------------------------------------------------------------------------------------------------------------------------------|
| <b>Depuis combien de temps as-tu arrêté de suivre une diète ?</b><br>Par exemple, si tu as arrêté de suivre une diète il y a cinq ans, répond de la manière suivante :<br>Depuis ____ mois OU depuis <u>5</u> ans. Si tu ne te souviens pas exactement de la date, essaie d'estimer au plus juste. | Depuis ____ mois<br>OU<br>Depuis ____ ans                                                                                                                                                                                                                                                                                                                                                                                                                                                                                        |
| <b>Pendant combien de temps as-tu suivi une diète ?</b><br>Par exemple, si tu as suivi une diète pendant cinq ans, répond de la manière suivante : Pendant ____ mois OU pendant <u>5</u> ans. Si tu ne te souviens pas exactement de la date, essaie d'estimer au plus juste.                      | Pendant ____ mois<br>OU<br>Pendant ____ ans                                                                                                                                                                                                                                                                                                                                                                                                                                                                                      |
| <b>Avec quelle rigueur suivais-tu ta diète ?</b>                                                                                                                                                                                                                                                   | De façon :<br><input type="checkbox"/> très stricte<br><input type="checkbox"/> peu stricte<br><input type="checkbox"/> pas stricte                                                                                                                                                                                                                                                                                                                                                                                              |
| <b>Quels aliments devais-tu éviter ? (p. ex produits laitiers, blé, etc.)</b>                                                                                                                                                                                                                      | Lesquels <br>_____<br>_____<br>_____                                                                                                                                                                                                                                                                                                                                                                                                        |
| <b>Pourquoi la diète a-t-elle été arrêtée ?</b>                                                                                                                                                                                                                                                    | <input type="checkbox"/> Ils n'ont apporté aucune amélioration à mes symptômes de l'OeE<br><br><input type="checkbox"/> Ils étaient initialement efficaces, mais ont ensuite perdu de leur efficacité<br><br><input type="checkbox"/> Ils ont conduit à des effets secondaires<br>Lesquels <br>_____<br>_____<br><input type="checkbox"/> La préparation trop longue des aliments<br><br><input type="checkbox"/> Le coût élevé de la diète |

|  |                                                                                                                                                                                                                                                 |
|--|-------------------------------------------------------------------------------------------------------------------------------------------------------------------------------------------------------------------------------------------------|
|  | <input type="checkbox"/> Restriction sociale (repas entre amis, famille, travail)<br><br><input type="checkbox"/> Autres raisons<br>Lesquels <br><hr/> <hr/> |
|--|-------------------------------------------------------------------------------------------------------------------------------------------------------------------------------------------------------------------------------------------------|

20 As-tu déjà bénéficié d'une dilatation de l'œsophage pour le traitement de l'OeE ?

☐ Non – Aller à la question 21

☐ Oui

→ Si oui, combien de fois ?

 \_\_\_\_ Fois

→ Si oui, quand était la dernière intervention ? Si tu ne te souviens pas exactement de la date, essaie d'estimer au plus juste.

Jour \_\_\_\_ Mois \_\_\_\_ Année \_\_\_\_



## QUESTIONNAIRE PARTIE 2: QUELLES SONT TES ATTENTES CONCERNANT LE TRAITEMENT DE L'OeE ?

Un traitement efficace de l'OeE peut permettre les améliorations suivantes: 1) soulagement ou résolution complète des symptômes; 2) amélioration de la qualité de vie liée à l'OeE; 3) amélioration ou disparition complète de l'inflammation visible au microscope; 4) réduction des cicatrices visibles au microscope; 5) amélioration ou disparition complète de l'inflammation visible à la gastroscopie.

### 21 Selon toi, quels sont les effets importants du traitement de l'OeE ?

**J'aimerais que le traitement de l'OeE ...**

*Plusieurs réponses sont possibles.*

|                                                                                            |                                                                                       |
|--------------------------------------------------------------------------------------------|---------------------------------------------------------------------------------------|
| 1) ... soulage ou fasse disparaître les symptômes                                          | <input type="checkbox"/>                                                              |
| 2) ... améliore la qualité de vie liée à la maladie                                        | <input type="checkbox"/>                                                              |
| 3) ... améliore ou fasse disparaître complètement l'inflammation visible au microscope     | <input type="checkbox"/>                                                              |
| 4) ... réduise les cicatrices visibles au microscope                                       | <input type="checkbox"/>                                                              |
| 5) ... améliore ou fasse disparaître complètement l'inflammation visible à la gastroscopie | <input type="checkbox"/>                                                              |
| 6) ... permette une diminution de la sténose de l'œsophage                                 | <input type="checkbox"/>                                                              |
| 7) ... autres attentes, merci de spécifier                                                 |  |

### 22 Selon toi, quels sont les effets les plus importants du traitement de l'OeE ?

**J'aimerais que le traitement de l'OeE ...**

*Merci de créer un classement en notant les numéros dans la case: 1 = effet le plus important, 2 = deuxième effet le plus important, 3 = troisième effet le plus important, 4 = quatrième effet le plus important, 5 = cinquième effet le plus important, 6 = l'effet le moins important*

|                                                                                            |                                                                                       |
|--------------------------------------------------------------------------------------------|---------------------------------------------------------------------------------------|
| 1) ... soulage ou fasse disparaître les symptômes                                          | <input type="checkbox"/>                                                              |
| 2) ... améliore la qualité de vie liée à la maladie                                        | <input type="checkbox"/>                                                              |
| 3) ... améliore ou fasse disparaître complètement l'inflammation visible au microscope     | <input type="checkbox"/>                                                              |
| 4) ... réduise les cicatrices visibles au microscope                                       | <input type="checkbox"/>                                                              |
| 5) ... améliore ou fasse disparaître complètement l'inflammation visible à la gastroscopie | <input type="checkbox"/>                                                              |
| 6) ... permette une diminution de la sténose de l'œsophage                                 | <input type="checkbox"/>                                                              |
| 7) ... autres attentes, merci de spécifier                                                 |  |

**23 Selon toi, quels sont les effets importants du traitement de l'OeE à court terme (3 prochains mois) ?**

**J'aimerais que le traitement de l'OeE ...**

*Plusieurs réponses sont possibles.*

|                                                                                            |                                                                                     |
|--------------------------------------------------------------------------------------------|-------------------------------------------------------------------------------------|
| 1) ... soulage ou fasse disparaître les symptômes                                          | <input type="checkbox"/>                                                            |
| 2) ... améliore la qualité de vie liée à la maladie                                        | <input type="checkbox"/>                                                            |
| 3) ... améliore ou fasse disparaître complètement l'inflammation visible au microscope     | <input type="checkbox"/>                                                            |
| 4) ... réduise les cicatrices visibles au microscope                                       | <input type="checkbox"/>                                                            |
| 5) ... améliore ou fasse disparaître complètement l'inflammation visible à la gastroscopie | <input type="checkbox"/>                                                            |
| 6) ... permette une diminution de la sténose de l'œsophage                                 | <input type="checkbox"/>                                                            |
| 7) ... autres attentes, merci de spécifier                                                 |  |

**24 Selon toi, quels sont les effets les plus importants du traitement de l'OeE à court terme (3 prochains mois) ?**

**J'aimerais que le traitement de l'OeE ...**

*Merci de créer un classement en notant les numéros dans la case: 1 = effet le plus important, 2 = deuxième effet le plus important, 3 = troisième effet le plus important, 4 = quatrième effet le plus important, 5 = cinquième effet le plus important, 6 = l'effet le moins important*

|                                                                                            |                                                                                       |
|--------------------------------------------------------------------------------------------|---------------------------------------------------------------------------------------|
| 1) ... soulage ou fasse disparaître les symptômes                                          | <input type="checkbox"/>                                                              |
| 2) ... améliore la qualité de vie liée à la maladie                                        | <input type="checkbox"/>                                                              |
| 3) ... améliore ou fasse disparaître complètement l'inflammation visible au microscope     | <input type="checkbox"/>                                                              |
| 4) ... réduise les cicatrices visibles au microscope                                       | <input type="checkbox"/>                                                              |
| 5) ... améliore ou fasse disparaître complètement l'inflammation visible à la gastroscopie | <input type="checkbox"/>                                                              |
| 6) ... permette une diminution de la sténose de l'œsophage                                 | <input type="checkbox"/>                                                              |
| 7) ... autres attentes, merci de spécifier                                                 |  |

**25 Selon toi, quels sont les effets importants du traitement de l'OeE à long terme (> une année) ?**

**J'aimerais que le traitement de l'OeE ...**  
*Plusieurs réponses sont possibles.*

|                                                                                            |                                                                                     |
|--------------------------------------------------------------------------------------------|-------------------------------------------------------------------------------------|
| 1) ... soulage ou fasse disparaître les symptômes                                          | <input type="checkbox"/>                                                            |
| 2) ... améliore la qualité de vie liée à la maladie                                        | <input type="checkbox"/>                                                            |
| 3) ... améliore ou fasse disparaître complètement l'inflammation visible au microscope     | <input type="checkbox"/>                                                            |
| 4) ... réduise les cicatrices visibles au microscope                                       | <input type="checkbox"/>                                                            |
| 5) ... améliore ou fasse disparaître complètement l'inflammation visible à la gastroscopie | <input type="checkbox"/>                                                            |
| 6) ... permette une diminution de la sténose de l'œsophage                                 | <input type="checkbox"/>                                                            |
| 7) ... autres attentes, merci de spécifier                                                 |  |

**26 Selon toi, quels sont les effets les plus importants du traitement de l'OeE à long terme (> une année) ?**

**J'aimerais que le traitement de l'OeE ...**  
*Merci de créer un classement en notant les numéros dans la case: 1 = effet le plus important, 2 = deuxième effet le plus important, 3 = troisième effet le plus important, 4 = quatrième effet le plus important, 5 = cinquième effet le plus important, 6 = l'effet le moins important*

|                                                                                            |                                                                                       |
|--------------------------------------------------------------------------------------------|---------------------------------------------------------------------------------------|
| 1) ... soulage ou fasse disparaître les symptômes                                          | <input type="checkbox"/>                                                              |
| 2) ... améliore la qualité de vie liée à la maladie                                        | <input type="checkbox"/>                                                              |
| 3) ... améliore ou fasse disparaître complètement l'inflammation visible au microscope     | <input type="checkbox"/>                                                              |
| 4) ... réduise les cicatrices visibles au microscope                                       | <input type="checkbox"/>                                                              |
| 5) ... améliore ou fasse disparaître complètement l'inflammation visible à la gastroscopie | <input type="checkbox"/>                                                              |
| 6) ... permette une diminution de la sténose de l'œsophage                                 | <input type="checkbox"/>                                                              |
| 7) ... autres attentes, merci de spécifier                                                 |  |

- 27 **Imagine que tu aies une OeE et que tu sois asymptomatique sous traitement efficace de corticoïdes topiques. L'examen endoscopique montre cependant des signes d'inflammation active (sans signe de sténose de l'œsophage) et à l'examen microscopique on retrouve la présence de cellules inflammatoires éosinophiles. Tu sais également que, sur le long terme, cette inflammation peut causer un rétrécissement de l'œsophage avec apparition des symptômes de la maladie.**

**Quelle importance portes-tu aux résultats de l'examen endoscopique/microscopique, malgré le fait que tu sois asymptomatique ?**

*Merci de choisir une seule réponse.*

- ☐ Très important
- ☐ Assez important
- ☐ Modérément important
- ☐ Peu important
- ☐ Pas du tout important

**Nous te remercions pour ta participation!**

*Nous t'avons laissé une page blanche à la fin du document. Merci d'y inscrire tous les commentaires que tu voudrais exprimer dans le cadre de ce questionnaire.*
